# Supplementary material for: Structural analysis of X-linked retinoschisis mutations reveals distinct classes which differentially effect retinoschisin function
Source: PubMed Central journal article supplement (PMC5418834; doi:10.1093/hmg/ddw345), 2016-10-23
Supplement: ddw345_Supp.pdf [file ddw345_Supp.pdf]

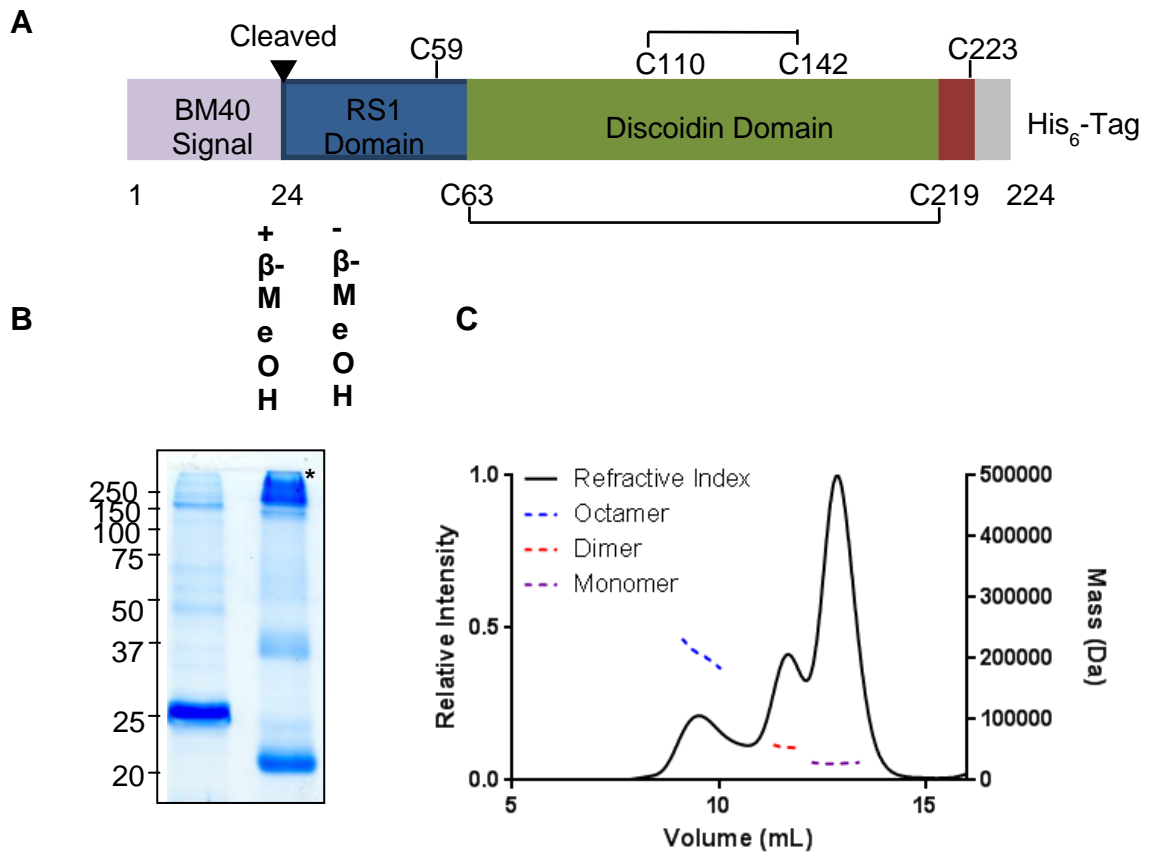

**Supplementary Figure 1** – Purification of wild-type retinoschisin. **(A)** Schematic diagram of the retinoschisin construct used for these studies, with residues required for disulphide formation marked. **(B)** SDS-PAGE gel of retinoschisin after Ni-NTA affinity purification, disulphide-dependent octamer formation indicated by \*. **(C)** SEC-MALS purification of retinoschisin, showing separation of Octamer, Dimer and Monomer species with molecular weights of ~200, 54 and 27kDa respectively.

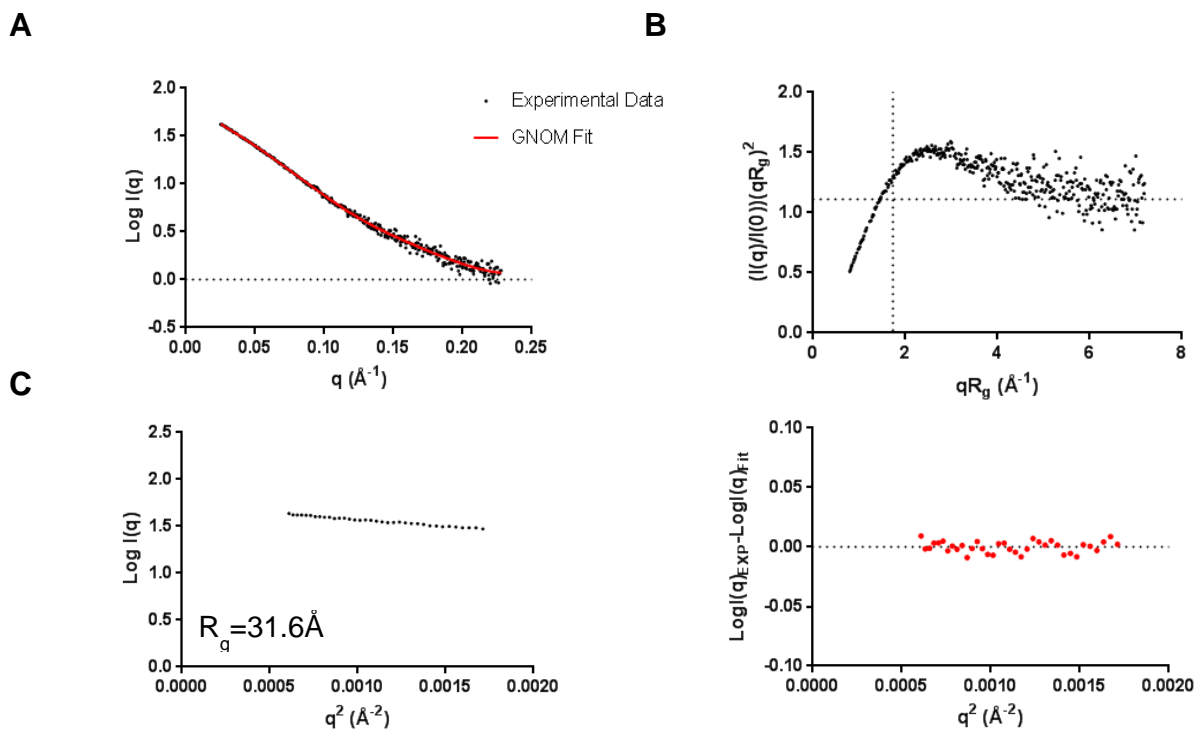

**Supplementary Figure 2 – SAXS analysis of wild-type retinoschisin monomer.** (A) The rotationally averaged scatter profile of purified retinoschisin monomer ( $\text{Log}I(q)$  vs.  $q$ ) with the GNOM fit superimposed to the scatter curve. (B)  $R_g$  normalized kratky plot of the retinoschisin monomer ( $(I(q)/I(0))(qR_g)^2$  vs.  $qR_g$ ) showing a peak consistent with a folded protein. Shown are the cross-hairs for globularity of the protein fold (1.1 vs.  $\sqrt{3}$ ). This analysis suggests a folded, elongated structure. (C) Guinier plot ( $\text{Log}I(q)$  vs.  $q^2$ ) of the low  $q$  region, showing a Radius of Gyration ( $R_g$ ) of 31.6 Å for the retinoschisin monomer with plotted residuals for the guinier region.

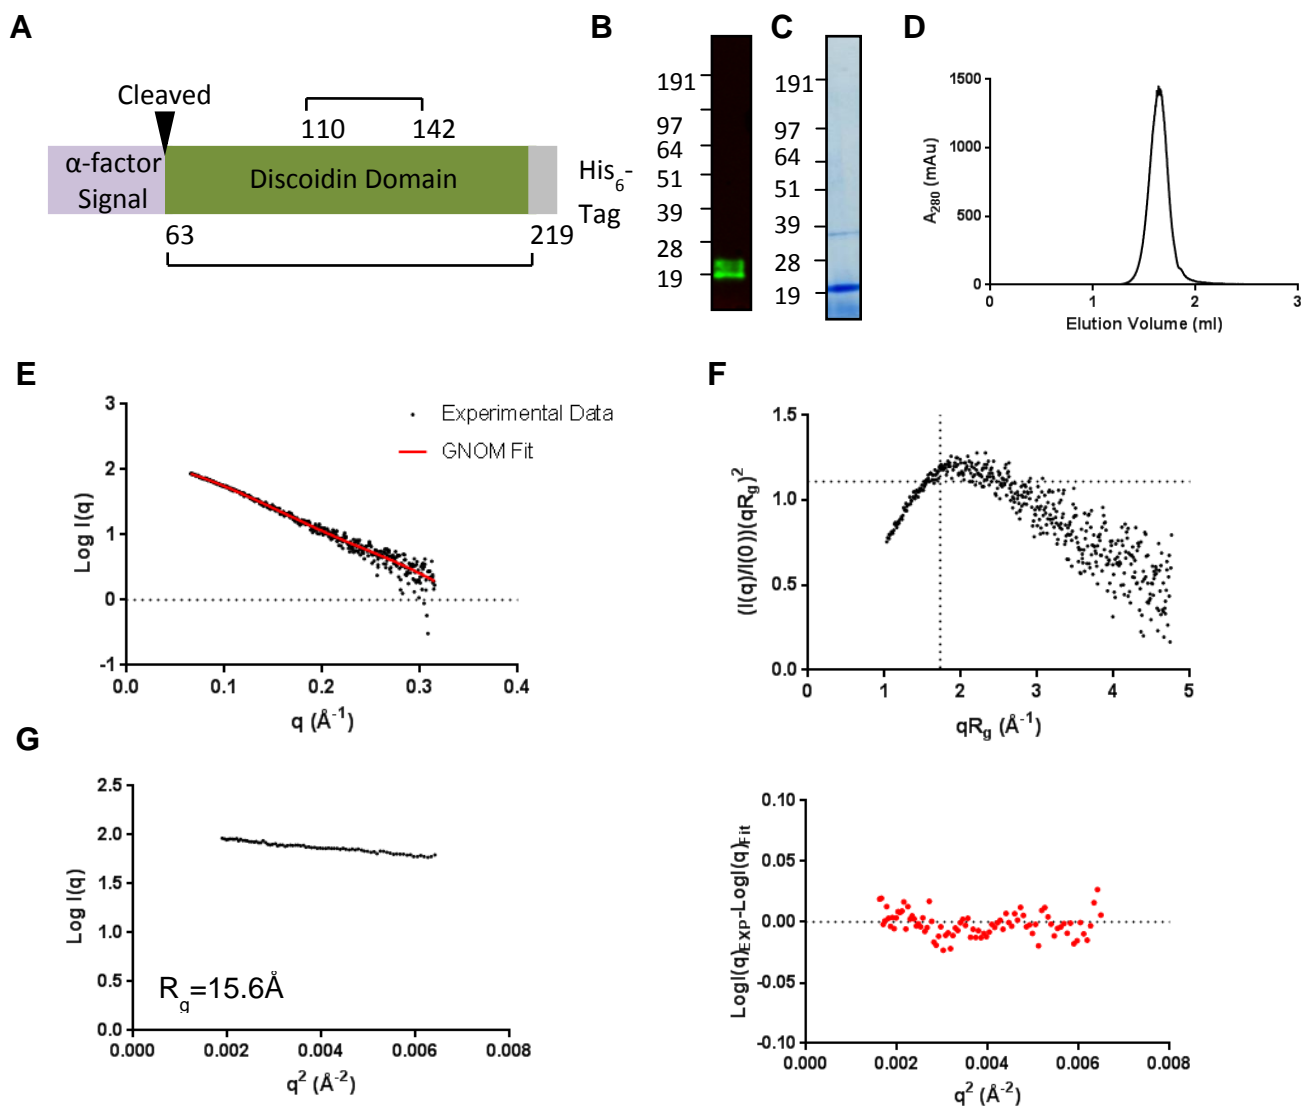

**Supplementary Figure 3** – Purification of mammalian discoidin domain from *Pichia pastoris*. **(A)** Schematic diagram of the construct expressed and secreted by *Pichia pastoris*. **(B)** Western blot of the elute from Ni-NTA chromatography probed with anti-His<sub>6</sub> antibody **(C)** Coomassie blue stained SDS-PAGE of size-exclusion chromatography elution. **(D)**  $A_{280}$  profile of the discoidin domain from the SEC-SAXS experiment. **(E)** The rotationally averaged scatter profile of the discoidin domain ( $\text{Log} I(q)$  vs.  $q$ ) with the GNOM fit superimposed to the scatter curve. **(F)**  $R_g$  normalized kratky plot of the discoidin domain ( $(I(q)/I(0))(qR_g)^2$  vs.  $qR_g$ ) showing a peak consistent with a folded protein. Shown are the cross-hairs for globularity of the protein fold (1.1 vs.  $\sqrt{3}$ ). **(G)** Guinier plot ( $\text{Log} I(q)$  vs.  $q^2$ ) of the low  $q$  region, showing  $R_g$  of 15.6 Å for the discoidin domain with plotted residuals for the guinier region.

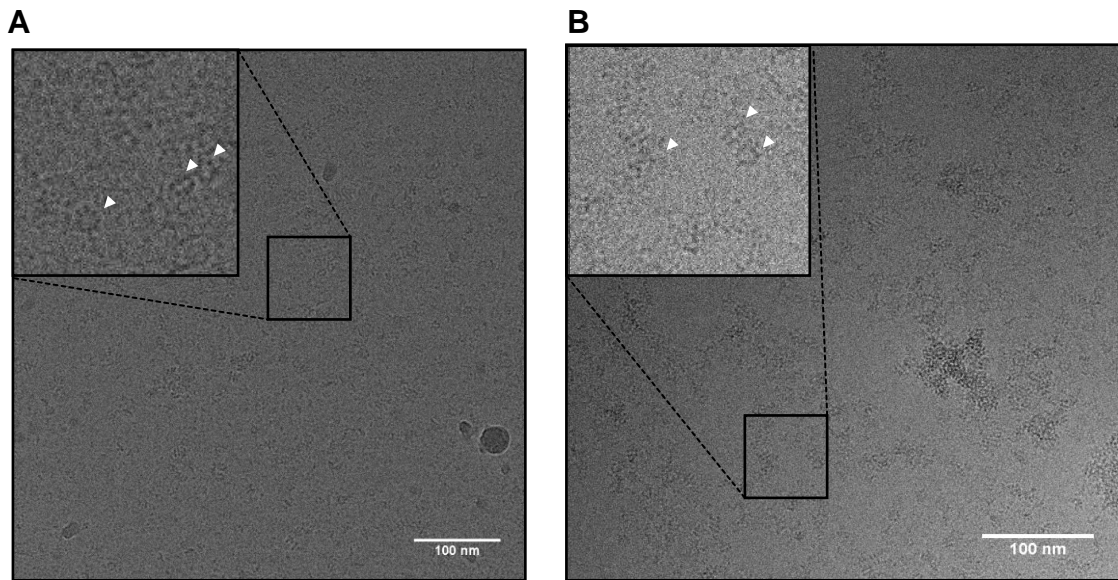

**Supplementary Figure 4** – Cryo-electron microscopy of retinoschisin. **(A)** Representative cryo-EM image with a field of dispersed particles for wild-type and **(B)** R141H octamers.

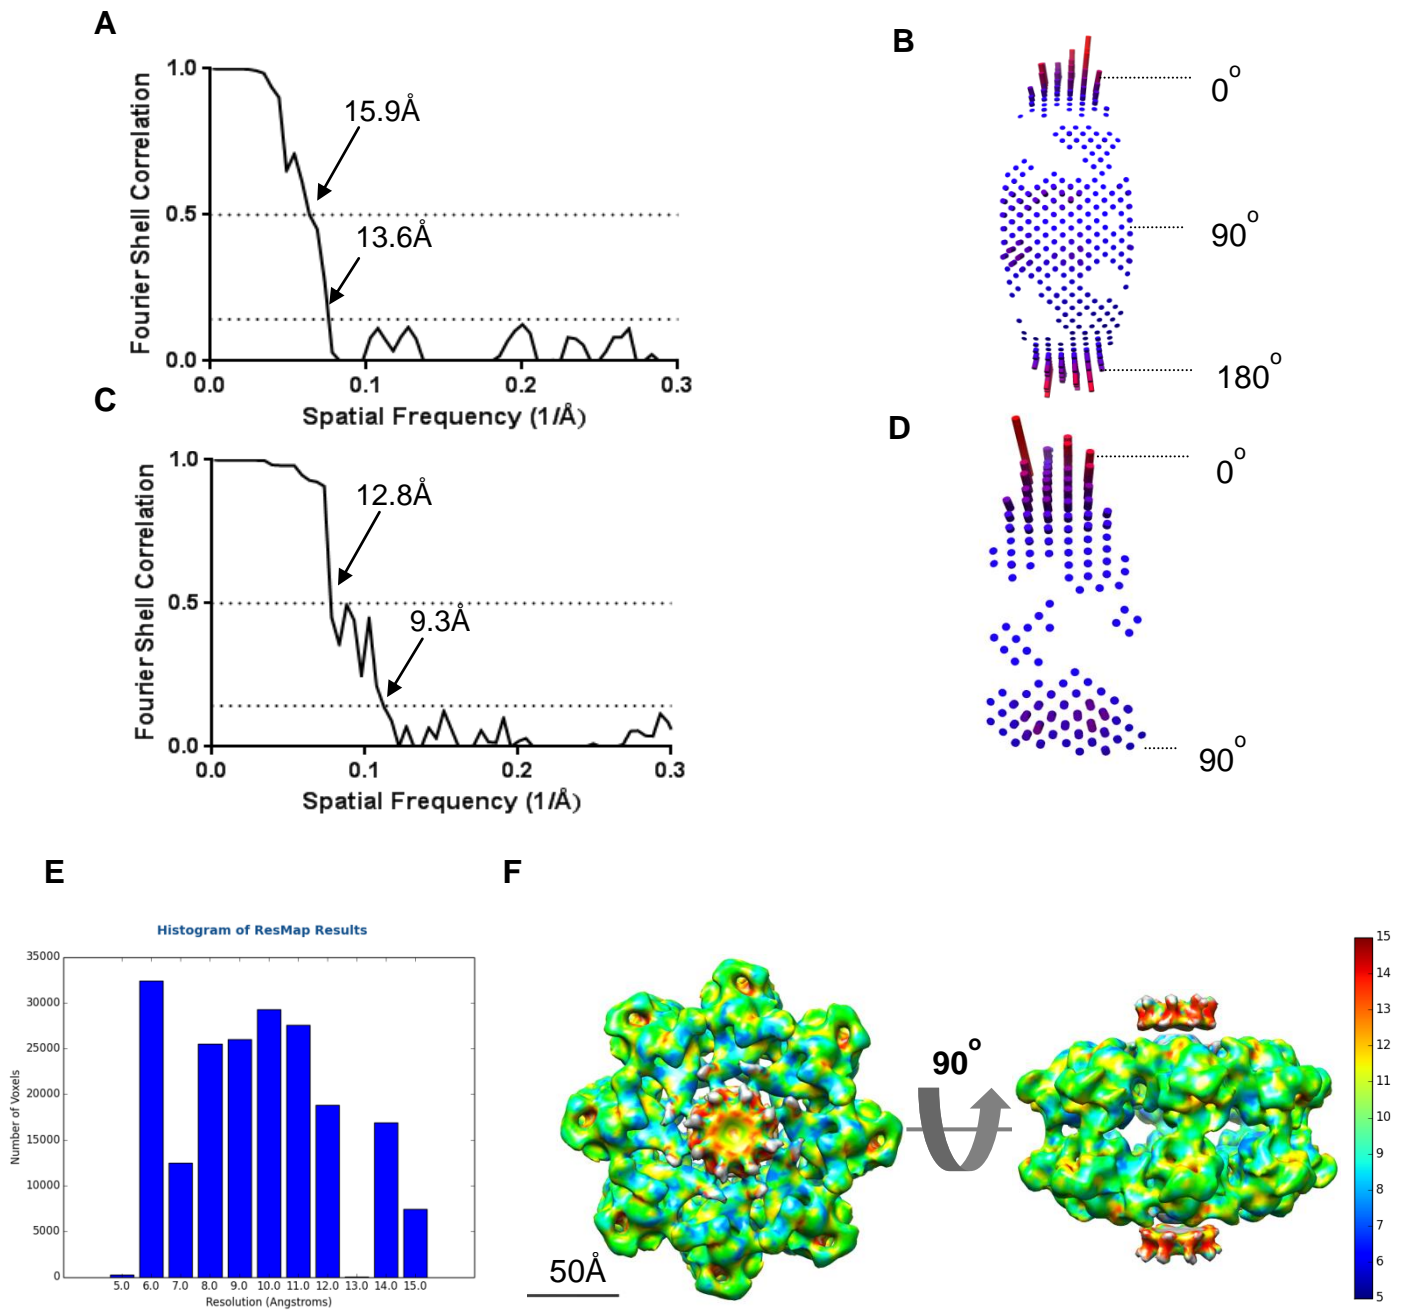

**Supplementary Figure 5** – Resolution estimation of the wild-type octamer and dimer of octamers maps. **(A)** Final Fourier shell correlation (FSC) of the RELION-refined octamer map. Shown are resolution estimates at 0.5 and 0.143 correlations. **(B)** Euler angle distribution of the octamer 3D reconstruction. **(C)** Final FSC of the RELION-refined dimer of octamers map. Shown are resolution estimates at 0.5 and 0.143 correlations. **(D)** Euler angle distribution of the dimer of octamers 3D reconstruction. **(E)** ResMap-H2 analysis of the dimer of octamers map, showing the relative proportions of voxels observed at different resolutions. **(F)** ResMap-H2 analysis visualised on wild-type dimer of octamers structure, showing local resolution variations throughout the map.

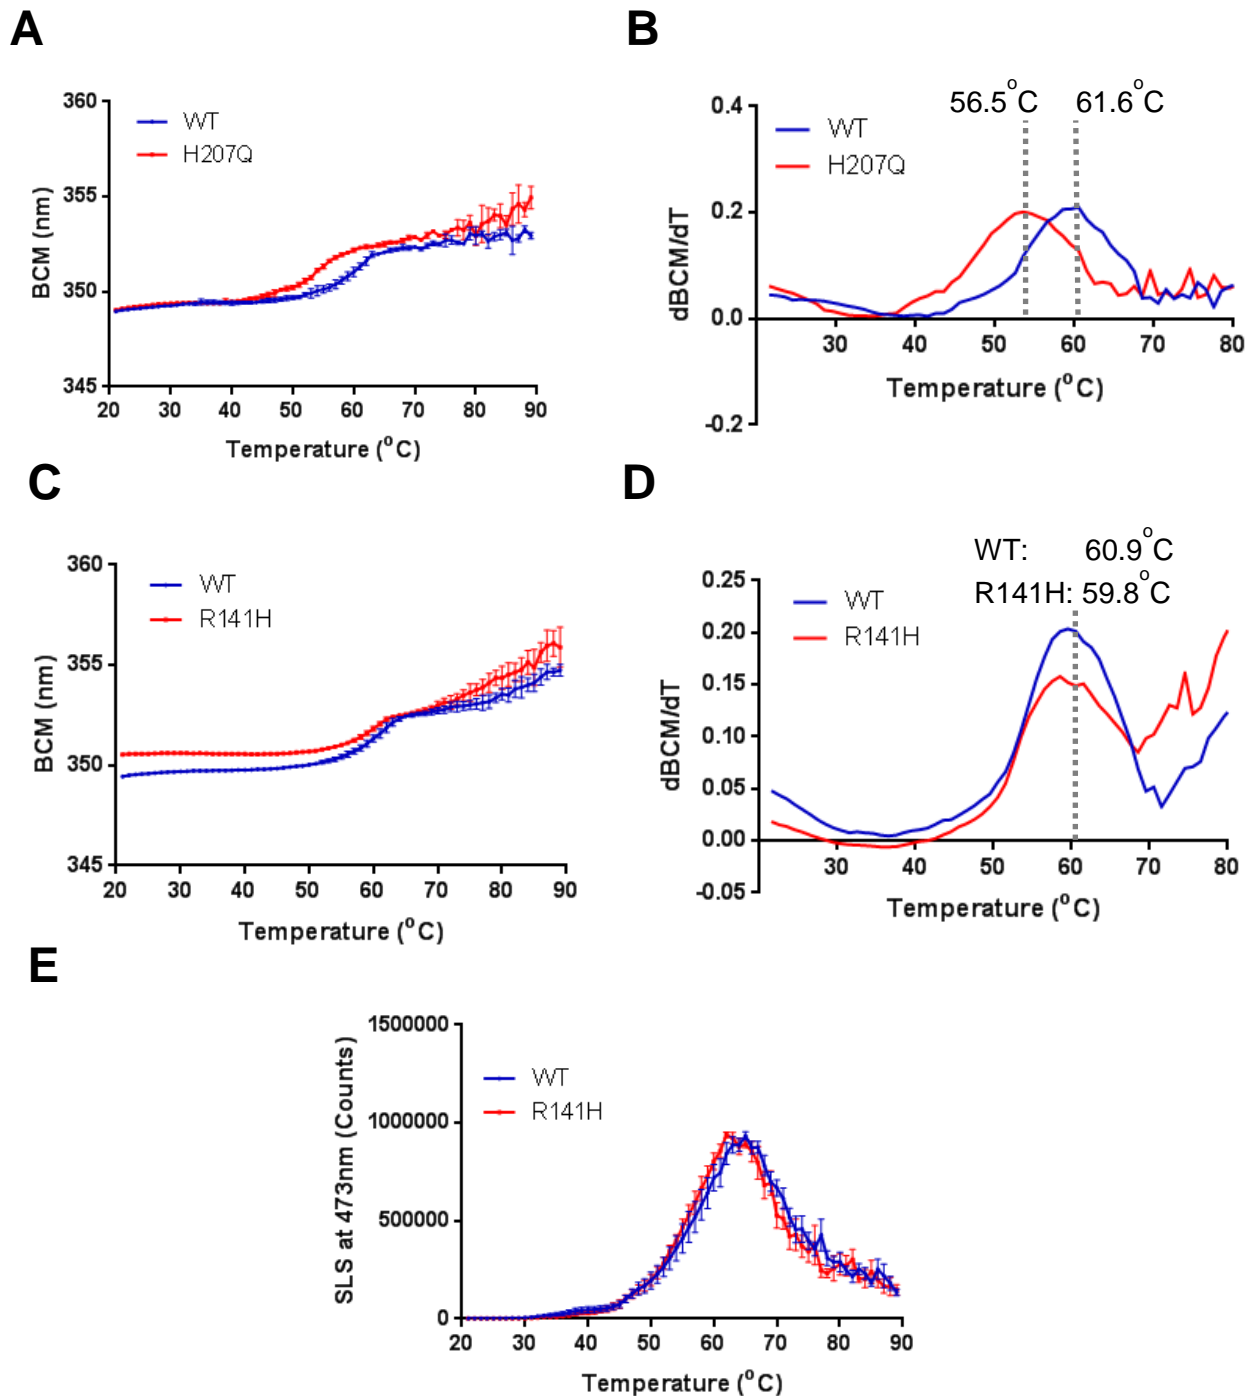

**Supplementary Figure 6** – Comparative thermal stability of wild-type, R141H and H207Q retinoschisin. **(A)** Barycentric Mean Intrinsic Fluorescence Measurements of wild-type and H207Q retinoschisin monomer across a temperature range of 20-90 $^{\circ}$ C, with the differentials of the temperature ramp shown in **(B)**, giving the  $T_m$  for both species. **(C)** Barycentric Mean Intrinsic Fluorescence Measurements of wild-type and R141H retinoschisin monomer across a temperature range of 20-90 $^{\circ}$ C, with the differentials of the temperature ramp shown in **(D)**, giving similar  $T_m$  for both species. **(E)** Static Light Scattering at 473nm for wild-type and R141H monomers across a temperature range of 20 – 90  $^{\circ}$ C showing similar onset of aggregation for both species.

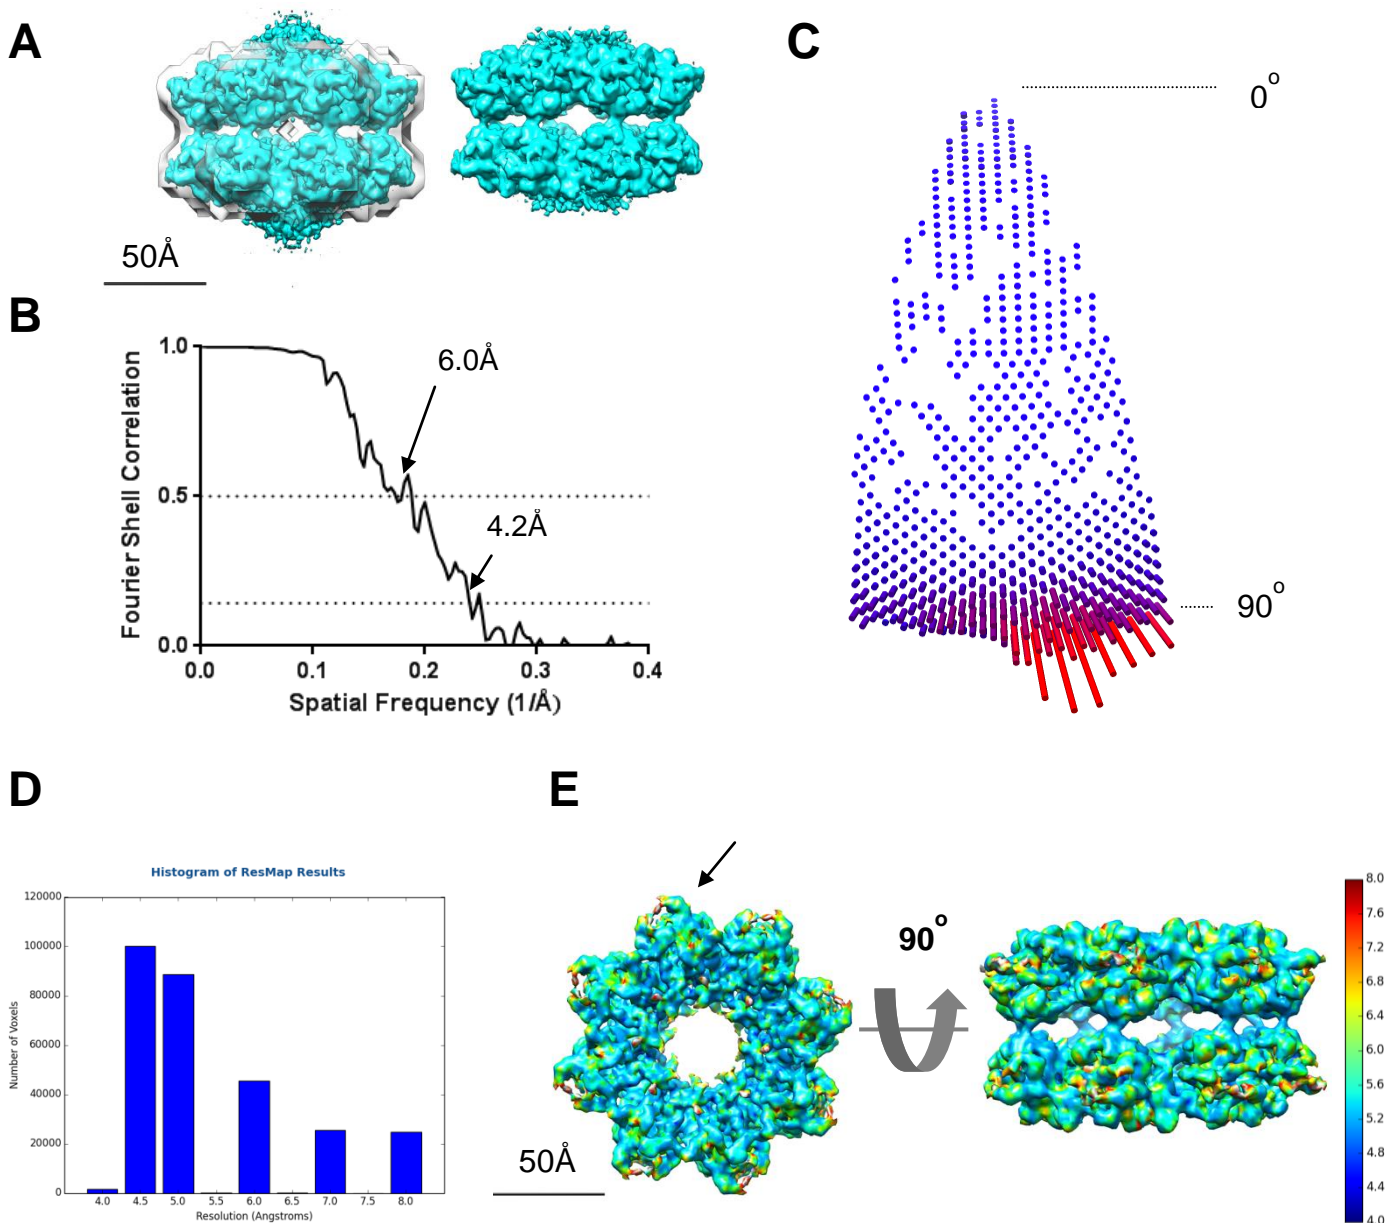

**Supplementary Figure 7** – Resolution estimation of the R141H dimer of octamers structure. **(A)** The application of the soft Gaussian mask to the retinoschisin dimer of octamers and the resulting masked structure used for domain fitting and resolution estimation is shown. **(B)** Final FSC of the masked RELION-refined map. Shown are resolution estimates at 0.5 and 0.143 correlations. **(C)** Euler angle distribution of the 3D reconstruction. **(D)** ResMap-H2 analysis of the R141H map, showing the relative proportions of voxels observed at different resolutions. **(E)** ResMap-H2 analysis visualised on R141H structure, showing local resolution variations throughout the map, regions with reduced resolution are marked with arrows.

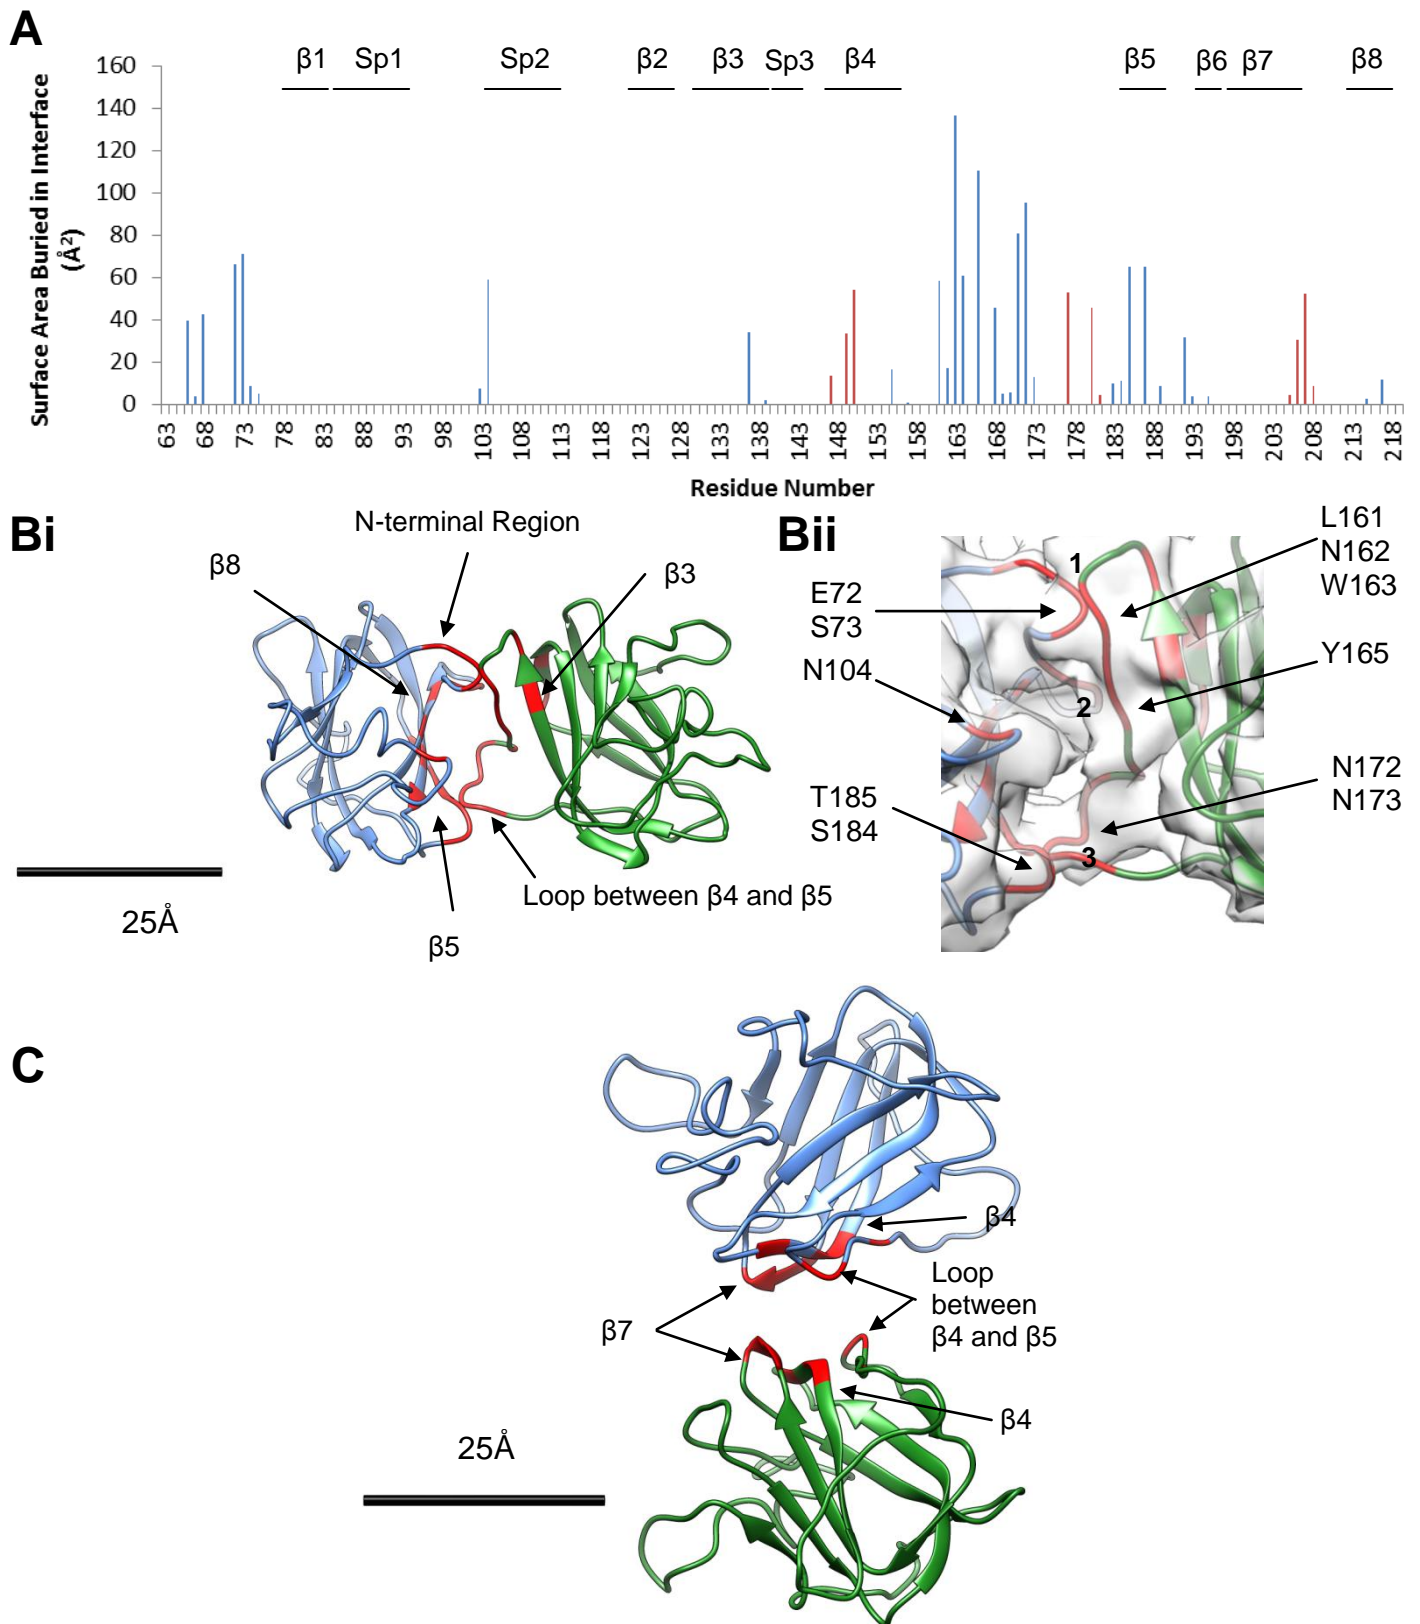

**Supplementary Figure 8** – Mapping of discoidin domain interfaces in the quasi-atomic model. **(A)** PDBePISA analysis of the interfaces within the hexadecamer. Residues which contribute to the intra-octamer interface are shown in blue and residues involved in the inter-octamer interface highlighted in red. **(Bi)** The intra-octamer interface between subunits within the octamer is shown with residues identified by PDBePISA highlighted. **(Bii)** The intra-octamer interface contains 3 main contact points, with residues in these regions labelled. **(C)** The inter-octamer interface is shown with PDBePISA-identified regions shown in red.



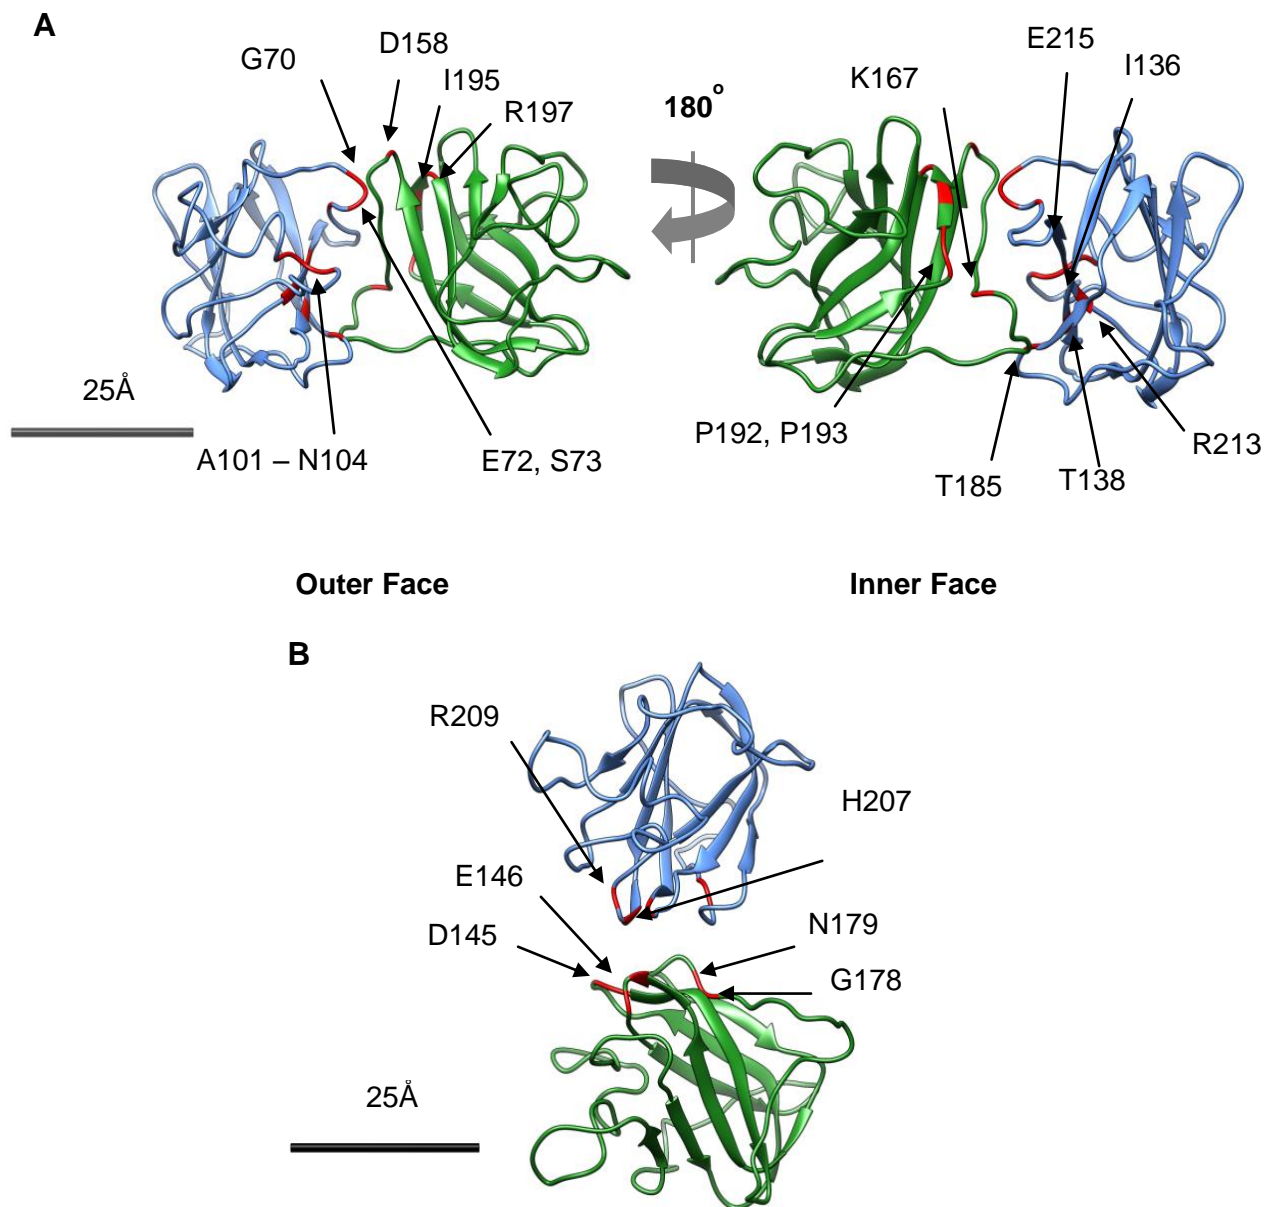

**Supplementary Figure 9** - Mapping XLR5-causative conservative mutations onto the quasi-atomic model. **(A)** The positions of non-cysteine, conservative XLR5-causative mutations which map to the intra-octamer interface are displayed in red. Shown are the mutations in the interface from both the outer and inner faces of the discoidin domain ring structure within the octamer. **(B)** Non-cysteine conservative XLR5-causative mutations, which map to the inter-octamer interface, are highlighted in red.
